# Supplementary material
Source: Springer Nature journal article supplement (https://www.springermedizin.de/resource/supplementary/12879_2007_630_MOESM3_ESM.pdf/9449388)

- Rectal artemisinin followed by Mefloquine
- Rectal artemisinin followed by Sulphadoxine-pyrimethamine

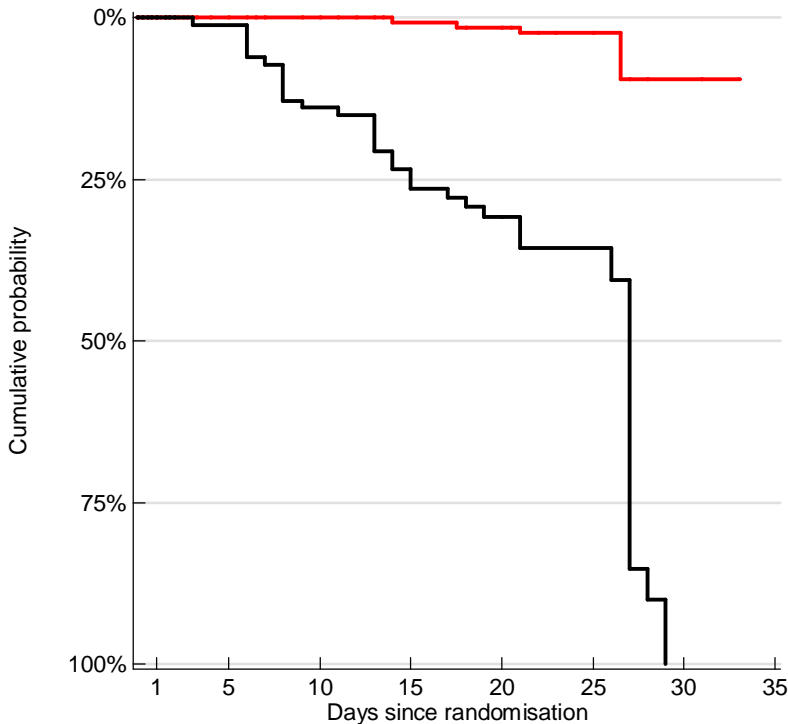

Supplement: MOESM3 [file 9449388]
